# 1 Multiple layers of phospho-regulation coordinate metabolism and the 2 cell cycle in budding yeast

3 Lichao Zhang<sup>2§</sup>, Sebastian Winkler<sup>1§</sup>, Fabian Schlottmann<sup>3</sup>, Oliver Kohlbacher<sup>1,5,6,7,8</sup>, Josh E. Elias<sup>2</sup>, Jan M.  
4 Skotheim<sup>4</sup>, Jennifer C. Ewald<sup>3\*</sup>

- 5 1. Applied Bioinformatics, Dept. of Computer Science, University of Tübingen, Germany
- 6 2. Dept. of Chemical and Systems Biology, Stanford University, CA, USA
- 7 3. Molecular Cell Biology, Interfaculty Institute of Cell Biology, University of Tübingen, Germany
- 8 4. Dept. of Biology, Stanford University, CA, USA
- 9 5. Institute for Translational Bioinformatics, University Hospital Tübingen, Germany
- 10 6. Institute for Bioinformatics and Medical Informatics, University of Tübingen, Germany
- 11 7. Quantitative Biology Center, University of Tübingen, Germany
- 12 8. Biomolecular Interactions, Max Planck Institute for Developmental Biology, Tübingen, Germany

13

14 § equal contributions;

15 \* corresponding author: Jennifer C. Ewald, [jennifer.ewald@ifiz.uni-tuebingen.de](mailto:jennifer.ewald@ifiz.uni-tuebingen.de)

16

17 Key words: cell division cycle, metabolism, proliferation, phosphoproteomics, *Saccharomyces cerevisiae*,  
18 CDK, PKA, PP1

## 19 Abstract

20 The coordination of metabolism and growth with cell division is crucial for proliferation. While it  
21 has long been known that cell metabolism regulates the cell division cycle, it is becoming  
22 increasingly clear that the cell division cycle also regulates metabolism. In budding yeast, we  
23 previously showed that over half of all measured metabolites change concentration through the  
24 cell cycle indicating that metabolic fluxes are extensively regulated during cell cycle progression.  
25 However, how this regulation is achieved still remains poorly understood. Since both the cell cycle  
26 and metabolism are regulated to a large extent by protein phosphorylation, we here decided to  
27 measure the phosphoproteome through the budding yeast cell cycle. Specifically, we chose a cell  
28 cycle synchronisation strategy that avoids stress and nutrient-related perturbations of metabolism,  
29 and we grew the yeast on ethanol minimal medium to force cells to utilize their full biosynthetic  
30 repertoire. Using a tandem-mass-tagging approach, we found over 200 sites on metabolic enzymes  
31 and transporters to be phospho-regulated. These sites were distributed among many pathways  
32 including carbohydrate catabolism, lipid metabolism and amino acid synthesis and therefore likely  
33 contribute to changing metabolic fluxes through the cell cycle. Among all one thousand sites  
34 whose phosphorylation increases through the cell cycle, the CDK consensus motif and an arginine-  
35 directed motif were highly enriched. This arginine-directed R-R-x-S motif is associated with  
36 protein-kinase A, which regulates metabolism and promotes growth. Finally, we also found over  
37 one thousand sites that are dephosphorylated through the G1/S transition. We speculate that the  
38 phosphatase Glc7/ PP1, known to regulate both the cell cycle and carbon metabolism, may play  
39 an important role because its regulatory subunits are phospho-regulated in our data. In summary,  
40 our results identify extensive cell cycle dependent phosphorylation and dephosphorylation of  
41 metabolic enzymes and suggest multiple mechanisms through which the cell division cycle  
42 regulates metabolic signalling pathways to temporally coordinate biosynthesis with distinct phases  
43 of the cell division cycle.

## 44 **Introduction**

45 For cells to proliferate, they need to coordinate cell growth driven by metabolism with the cell  
46 division cycle, which ensures that DNA and other crucial cellular components are duplicated and  
47 divided between two daughter cells. In budding yeast, it was viewed that cell metabolism and  
48 growth proceed largely independently of the cell cycle. This assumption comes from the  
49 observation that mutants arrested in distinct phases of the cell cycle continued to grow and became  
50 extremely large and irregularly shaped (Hartwell et al., 1974; Johnston et al., 1977; Pringle and  
51 Hartwell, 1981). This showed clearly that a cell cycle arrest does not stop metabolism and mass  
52 accumulation, which led to the text book model that in budding yeast growth controls division, but  
53 not vice versa (Morgan, 2007).

54 While the hierarchy of metabolism driving the cell cycle was long the consensus, many studies  
55 over this past decade have challenged this view. It now seems that metabolism, growth and division  
56 are tightly and multi-directionally coordinated in all eukaryotes including yeast (Goranov and  
57 Amon, 2010; Ewald, 2018). Indeed, several core cell cycle regulators also target metabolic  
58 pathways and thereby control metabolism and growth: The most central cell cycle regulator, the  
59 cyclin-dependent kinase (CDK), has been found to directly target proteins in carbohydrate and  
60 energy metabolism in yeast (Ewald et al., 2016; Zhao et al., 2016), flies (Icreverzi et al., 2012) and  
61 mammals (Galbraith et al., 2017; Wang et al., 2017) (reviewed in (Solaki and Ewald, 2018)).  
62 Moreover, in addition to its role in mitosis, the polo kinase routes fluxes through the pentose-  
63 phosphate pathway by phosphorylating glucose-6-phosphate dehydrogenase in human cancer cell  
64 lines (Ma et al., 2017), and the cell cycle regulated ubiquitin ligase APC/C (anaphase promoting  
65 complex) regulates glucose metabolism in HeLa cells (Tudzarova et al., 2011). However, while  
66 specific examples of cell cycle regulators controlling metabolic pathways are accumulating, the  
67 global scope of metabolic regulation during the cell cycle is still largely unexplored.

68 The global regulation of metabolic processes during cell cycle progression is likely to be vast  
69 because 50% of the measured metabolites in budding yeast change concentration significantly in  
70 cells released synchronously into the cell cycle from a G1 arrest (Ewald et al., 2016). This suggests  
71 there are still many regulatory interactions coordinating metabolism and growth with cell cycle  
72 progression to be discovered. So far, we do not know which metabolic enzymes are targeted by  
73 which signalling pathways to control metabolic fluxes during the cell cycle.

74 To begin to address cell cycle-dependent regulation of metabolism, we performed a time-resolved  
75 proteome and phospho-proteome study through the cell cycle in synchronized yeast cultures.  
76 While there have been several phospho-proteomics reports on the budding and fission yeast cell  
77 cycle (Archambault et al., 2004; Holt et al., 2009; Carpy et al., 2014; Swaffer et al., 2016; Touati  
78 et al., 2018; Touati and Uhlmann, 2018), there are two important factors that make this study  
79 unique and complementary to previous work: First, we employed a synchronization strategy that  
80 releases cells from a G1 arrest without external perturbations of metabolism such as media  
81 switches, temperature shifts, addition of toxic chemical, or physical stress (Ewald et al., 2016;  
82 Rosebrock, 2017). Second, nearly all yeast cell cycle studies are performed using cells growing on  
83 complex or synthetic complete media, while we grow cells on ethanol minimal medium to force  
84 cells to activate a much larger repertoire of biosynthetic pathways. We found that more than two  
85 hundred phosphorylation sites on metabolic enzymes and transporters change in abundance during  
86 the cell cycle. Our data further suggests that metabolic signalling pathways including PKA, Snf1,

87 and Glc7 are transiently regulated during cell cycle progression. Thus, we provide evidence for  
88 multiple layers of phospho-regulation that coordinate metabolism with cell cycle progression.

89

## 90 **Results**

91 In this study, we wanted to identify mechanisms coordinating metabolism with cell cycle  
92 progression. Since both the cell cycle (Morgan, 2007; Enserink and Kolodner, 2010) and metabolic  
93 fluxes (Oliveira et al., 2012; Conrad et al., 2014; Chen and Nielsen, 2016) are known to be strongly  
94 regulated by phosphorylation, we decided to perform a phospho-proteomics and total proteomics  
95 time course of cells progressing through the cell cycle. Specifically, we arrested cells growing on  
96 ethanol minimal medium in G1 using our previously described hormone-inducible-cyclin strains  
97 (Ewald et al., 2016). These cells lack endogenous G1 cyclins (*cln1Δcln2cln3Δ*) and have an  
98 exogenous copy of *CLN1* that is expressed from an estradiol-inducible promoter (*LexApr-CLN1*)  
99 (Ottoz et al., 2014). Importantly, this strain can be released from a G1 arrest by adding 200 nM  
100 estradiol, which induces G1 cyclin expression without any other detectable cellular perturbations.  
101 Avoiding perturbations such as media changes, physical or temperature stress during the  
102 synchronous release is crucial when aiming to study metabolism, because many metabolic  
103 pathways are regulated in response to stress (Gasch and Werner-Washburne, 2002; Brauer et al.,  
104 2008). With this hormone-inducible strain, we performed two replicate experiments which showed  
105 very similar and highly synchronous budding profiles (Figure 1A-B). We note that we present data  
106 for the first two hours after the G1 release, which corresponds to most cells being in early mitosis  
107 and is before cells lose synchrony (Ewald et al., 2016).

108 From our two cell cycle synchronized cultures, we sampled ten time points from each replicate.  
109 Cells were lysed, proteins were digested with trypsin and lysC, and phosphopeptides were enriched  
110 with TiO<sub>2</sub> and labelled with the TMT-10 plex (Figure 1A and methods).

111 In our total proteome cell cycle time course, we quantified over 4,000 proteins, with more than  
112 90% overlap between the replicates (Figure 1C, Supplementary Table 1). Using an MS3 approach  
113 (25) and stringent quality criteria (see methods) we quantified a total of 9,267 unique  
114 phosphopeptides across all time points. This resulted in almost 8,000 quantified phosphorylation  
115 sites with approximately half of these quantified in both replicates (Figure 1D, Supplementary  
116 Table 2). As reported in previous studies (14, 26), the overall changes in the proteome through the  
117 cell cycle are small. In contrast, approximately one third of all phospho-sites change in abundance  
118 during the cell cycle suggesting cell cycle-dependent phosphorylation of these sites (Figure 1E).

119 Next, we sought to identify which phosphorylation sites were regulated during the cell cycle and  
120 test the quality and reproducibility of our phosphoproteome data. We first ranked the time profiles  
121 of all phosphorylation sites based on a heuristic p-value of change across the cell cycle (see  
122 methods). We then removed sites from further analysis that strongly correlated with total protein  
123 abundance, since these are unlikely to be regulated mainly by phosphorylation. We used the top  
124 third of the sites based on our ranking for further analysis (Supplementary Figure 1). To test the  
125 quality and reproducibility of our data, we correlated all ten time points of replicate 1 with all ten  
126 time points of replicate 2. Samples from corresponding times after release correlated well with p-  
127 values (Pearson correlation) of 10<sup>-15</sup> or less for each of the ten time points (Figure 2A). As  
128 expected, neighbouring time points show a higher degree of correlation than more distant data  
129 points. Moreover, a principle component analysis (PCA) separated the samples according to the

130 time they were taken along the first component, and replicate samples were positioned near each  
131 other in the first two PCA components (Figure 2B), an indication of the accuracy of the acquired  
132 data. To test if our data captures known cell cycle regulation, we used the DeRegNet software  
133 (Winkler et al in preparation, see methods), which identifies regulated subnetworks from large  
134 interaction networks. Here, we used the KEGG interaction network and searched for regulated  
135 subnetworks in our top-ranking phospho-sites (see methods). This approach recapitulated many  
136 aspects of the G1/S regulation (Figure 2C), indicating that our data is in good agreement with  
137 known cell cycle regulation.

138 Having established the quality of our phosphoproteomics time course, we next investigated which  
139 metabolic enzymes were dynamically phosphorylated and possibly regulated. To analyse the  
140 trends in the data set and how they relate to metabolism, we clustered the top-ranking sites using  
141 k-means clustering into five distinct clusters (Figure 3A-B; four, six and eight clusters give  
142 qualitatively similar results as shown in Supplementary Figure 2). For each cluster, we analysed  
143 which of the phosphorylation sites were annotated to proteins listed in the yeast metabolome  
144 database (Ramirez-Gaona et al., 2017) (Figure 3A). Proteins related to metabolism were found in  
145 every cluster, and, in total 243 sites on 134 metabolic proteins were changing (Figure 3B).  
146 Interestingly, more sites on these metabolic proteins were dephosphorylated than phosphorylated  
147 (Figure 3C). To determine which metabolic pathways were most likely affected by phospho-  
148 regulation, we sorted the 81 most dynamic sites on metabolic proteins from clusters 1, 2, and 5  
149 into KEGG categories. All major metabolic pathways were represented and there was no particular  
150 category enriched relative to the whole dataset. In line with our previous metabolomics data  
151 showing that over half of ~500 measured metabolites change throughout the cell cycle (Ewald et  
152 al., 2016), these phosphoproteomics data suggest that global adaptations across metabolism are  
153 occurring during the cell cycle and are at least in part regulated by phosphorylation.

154 We next wanted to determine which of the measured changes in enzyme phosphorylation may  
155 directly contribute to changes in metabolic activity. As a rough approximation of metabolic  
156 activity we use the product-to-substrate ratios from our previous metabolomics data set (Ewald et  
157 al., 2016). A change in the product-to-substrate ratio indicates a change in the kinetics of the  
158 reaction. For 174 sites on 82 proteins in our data set we had at least one substrate and one product  
159 (not including cofactors) for the reaction catalysed by the phosphorylated enzyme. For each of  
160 these reactions we correlated the phospho-site abundance with the product-to-substrate ratio  
161 (Supplementary Table 3). We found 19 sites on 15 enzymes with an  $R^2$  of the correlation greater  
162 than 0.5 (Supplementary Figure 3). One example is an enzyme well known to be upregulated  
163 during the cell cycle: the ribonucleotide-reductase complex, which catalyzes the conversion of  
164 NTPs to dNTPs (Lowdon and Vitols, 1973). The CDK consensus site S816 on Rnr1 correlates  
165 well with the ratio of dCTP to CTP (We note that cytosine nucleotides were chosen as example  
166 since they have unique masses in our metabolome data set and they do not participate in as many  
167 other reactions as adenylate or guanylate nucleotides) (Figure 4A-C). It therefore seems likely that  
168 Rnr1 S816 contributes to activating enzyme activity. Additionally, Rnr1 is also transcriptionally  
169 upregulated, but the increase in phosphorylation on S816 greatly exceeds the increase in total  
170 protein (Supplementary Figure 4). A second example is glutamine-fructose-6-phosphate  
171 amidotransferase (Gfa1), which catalyses the first step in the chitin pathway necessary for cell wall  
172 synthesis. The site S332 on this Gfa1 is dephosphorylated during the cell cycle which anti-  
173 correlates with the product to substrate ratio (Figure 4 D-F). We therefore suggest that this is an  
174 inhibitory phosphorylation which is being released during the cell cycle to increase chitin synthesis

175 for surface expansion and cytokinesis. Whether this dephosphorylation is directly regulated by the  
176 cell cycle machinery or whether it is a secondary effect downstream of other metabolic changes  
177 (such as trehalose and glycogen utilization (Ewald et al., 2016; Zhao et al., 2016)) remains to be  
178 investigated. The resulting slopes and  $R^2$  of all correlations that could be determined based on the  
179 two datasets are reported in Supplementary Table 3.

180 To investigate which kinases contribute most to increasing phosphorylation in metabolic and all  
181 other proteins, we performed an unbiased motif analysis using the motif-x algorithm (Schwartz  
182 and Gygi, 2005) implemented on the Meme-suite (Bailey et al., 2009; Cheng et al., 2019). Not  
183 surprisingly, the two clusters corresponding to phosphorylation sites increasing early and late  
184 through the cell cycle were highly enriched for CDK consensus sites (S/T-P-X-K/R) and minimal  
185 CDK sites (S/T-P) sites (Figure 5A-B). However, the most enriched motif in the gradually  
186 increasing cluster 3 was RRxS/T and not proline-directed. This motif is the consensus sequence  
187 associated with the protein kinase A (PKA) and some other kinases (Ptacek et al., 2005; Mok et  
188 al., 2010). In clusters 1-3, which contained all sites increasingly phosphorylated through the cell  
189 cycle, almost half were proline directed and 15% were arginine directed (putative PKA targets)  
190 (Figure 5C). When we were only examining phosphorylation sites on metabolic proteins, we  
191 obtained a similar distribution (Figure 5D).

192 That we identified consensus PKA phosphorylation sites as being dynamic through the cell cycle  
193 is interesting because PKA kinase is a sensor of nutrients (mainly glucose) and environmental  
194 stresses. PKA promotes cell growth and glucose repression and inhibits several stress responses  
195 (Broach, 2012; Conrad et al., 2014). Since we did not change the nutrient or stress conditions of  
196 our yeast cultures, we wanted to further investigate how putative PKA target sites could be  
197 increasingly phosphorylated during cell cycle progression. We noticed that several regulators  
198 upstream of PKA seemed to be phospho-regulated during cell cycle progression, with several  
199 phosphorylation sites either increasingly or decreasingly phosphorylated through the cell cycle  
200 (Figure 6). Many of the increasingly phosphorylated sites were proline directed (Figure 6B, D, E)  
201 and were similar to CDK consensus sites. This suggests that the Ras-branch of the PKA pathway  
202 could be activated by the cell cycle machinery to control downstream processes in metabolism and  
203 growth.

204 In addition to examining the sites increasingly phosphorylated through the cell cycle, we also  
205 wanted to investigate the sites being dephosphorylated through the cell cycle because they could  
206 be equally important. Dephosphorylation during the cell cycle is mainly discussed in the context  
207 of phosphatases counteracting CDK phosphorylation when cells go through mitosis (Mochida and  
208 Hunt, 2012; Rogers et al., 2016; Kataria et al., 2018) and in early G1 (Godfrey et al., 2017). In our  
209 experiment, we noticed that there are at least as many dephosphorylation events as phosphorylation  
210 events during the G1/S transition and S-phase, which are cell cycle transitions typically associated  
211 with increasing kinase activity. For metabolic proteins, twice as many sites were dephosphorylated  
212 through G1 to S as phosphorylated.

213 The prevalence of dephosphorylation through the cell cycle led us to wonder which phosphatases  
214 could be contributing, especially with regard to metabolism. In this context, we noticed that one  
215 of the top-ranking phosphorylation sites in our list was on Reg1, a regulatory subunit of the  
216 phosphatase Glc7 of the well-conserved PP1 family (Verbinnen et al., 2017). Glc7 has many  
217 targets and important functions in the cell cycle and in carbon metabolism (Cannon, 2010). Glc7  
218 obtains its specific activity through interactions with regulatory subunits like Reg1 (Figure 7B)

219 and has little specificity on its own. It does not seem to be regulated in abundance or in its  
220 phosphorylation state during the cell cycle (Supplementary Tables 1 and 2). Motivated by the  
221 identification of Reg1 as a dynamically phosphorylated protein, we searched our list of high-  
222 ranking phosphorylation sites for other Glc7 subunits. We found regulatory subunits that are  
223 known to regulate cell cycle functions including Bni4, which regulates bud neck and septum  
224 assembly, and Gip3, which regulates chromosome segregation (Figure 7A). Additionally, several  
225 of the subunits involved in regulating metabolism including Reg1 (glucose repression) and Gac1  
226 (glycogen metabolism) were dynamically phosphorylated (Figure 7C). Although we did not find  
227 any annotated functions to these specific sites, it is tempting to speculate that these phosphorylation  
228 sites impact either binding of its targets or binding of the regulatory subunit to the catalytic subunit.

229 To further investigate the idea that the cell division cycle drives changes in Glc7 phosphatase  
230 activity, we searched for known Glc7-Reg1 targets among our list of dephosphorylated sites. One  
231 of the most prominent targets of Glc7-Reg1 is the kinase Snf1 (homolog of mammalian AMPK  
232 (Hardie, 2011)). Snf1 is activated in the absence of glucose by phosphorylation on site T210  
233 (Conrad et al., 2014). This activating phosphorylation is counter-acted by dephosphorylation by  
234 Reg1-Glc7 (Tu and Carlson, 1995). Consistent with our model, we find that Snf1 T210 is  
235 decreasing in abundance during the G1/S transition and seems to recover later in the cycle (Figure  
236 8A). This was surprising given that Snf1 normally responds to changes in external glucose, which  
237 was constantly absent throughout our experiment. In response to glucose limitation, Snf1 regulates  
238 several aspects of carbon metabolism including the deactivation of the transcription factor Mig1.  
239 Mig1 is phosphorylated by Snf1 on at least four sites in its nuclear localization sequence and at  
240 least some of these sites are also reported to be dephosphorylated by Reg1-Glc7 (Smith et al.,  
241 1999). We therefore wondered whether Mig1 was also phospho-regulated during the cell cycle.  
242 We found one site S302, which closely follows the pattern of Snf1 dephosphorylation  
243 (Supplementary Figure 5A). While this site has not been specifically reported to be either a Snf1  
244 or Reg1 target, it lies right between two Snf1 sites within the regulatory domain of Mig1  
245 (Supplementary Figure 5C). Another site, T371, also lies within the Mig1 regulatory domain and  
246 is increasingly phosphorylated through the cell cycle (Supplementary Figure 5B). Interestingly,  
247 this site contains a proline in +1, which may point to phosphorylation by CDK1 as suggested by  
248 earlier studies (Holt et al., 2009; Zhao et al., 2016). A GFP-tagged Mig1 did not change localisation  
249 during the cell cycle under our growth conditions, suggesting these phosphorylation sites regulate  
250 Mig1 in a localisation-independent way.

251

## 252 Discussion

253 The aim of this study was to identify mechanisms coordinating metabolism and growth with the  
254 cell division cycle in budding yeast. Since both metabolism (Conrad et al., 2014; Chen and Nielsen,  
255 2016) and the cell cycle (Morgan, 2008; Enserink and Kolodner, 2010) are extensively phospho-  
256 regulated, we performed a phosphoproteomics time-course of cells released from a G1 arrest. In  
257 contrast to previous phospho-proteomics studies, our main focus was to explore the phospho-  
258 regulation of metabolism through the cell cycle. We therefore took extreme care to employ a  
259 synchronisation strategy that would not lead to metabolic alterations through media changes or  
260 stress responses. To achieve this, our study was conducted with prototrophic strains growing on  
261 ethanol minimal medium, where cells grow slowly and need to activate their full biosynthetic  
262 potential. Our novel high quality dataset is therefore complementary to other phosphoproteomics

263 data sets on the yeast cell cycle (Archambault et al., 2004; Holt et al., 2009; Touati et al., 2018;  
264 Touati and Uhlmann, 2018).

265 In summary, we found over 200 sites on metabolic enzymes that were either increasingly  
266 phosphorylated or dephosphorylated throughout the cell cycle. In agreement with our previous  
267 metabolomics study (Ewald et al., 2016), many different metabolic pathways were affected  
268 including carbohydrate, lipid, amino acid and nucleotide metabolism. While most of these sites  
269 still need to be functionally validated, the sheer number of phosphorylated or dephosphorylated  
270 sites suggests that phosphorylation contributes significantly to tailoring metabolic fluxes to the  
271 specific requirements of different cell cycle phases.

272 The identification of large-scale changes in phospho-isoforms through the cell division cycle  
273 raised the question as to which signalling pathways were responsible. We and others previously  
274 showed that the cyclin-dependent kinase directly regulates the activity of several metabolic  
275 enzymes such as the trehalase Nth1 (Ewald et al., 2016; Zhao et al., 2016) and the lipase Tgl4  
276 (Kurat et al., 2009). This is unlikely to represent the full extent of metabolic regulation by CDK  
277 because previous work on rich media identified several other metabolic enzymes that were likely  
278 phosphorylated by CDK (Ubersax et al., 2003; Holt et al., 2009; Zhao et al., 2016). Using our  
279 minimal media conditions, we further expand the list of putative direct CDK targets in metabolism.  
280 However, the data also suggest that a direct regulation of enzymes by the cell cycle-dependent  
281 increase in proline directed CDK activity is not the main driver of adjusting metabolic fluxes, since  
282 many enzymes get dephosphorylated rather than phosphorylated, and only a minority of all  
283 phosphorylated sites are proline directed. We therefore suggest that a lot of the cell cycle-  
284 dependent phospho-regulation controlling metabolic fluxes is not directly through CDK activity,  
285 but entails additional pathways.

286 One such additional pathway could be the protein-kinase A signalling pathway. Our data suggests  
287 that the PKA pathway is cell cycle regulated and in turn contributes to cell cycle-dependent  
288 phosphorylation of downstream pathways. Two independent observations lead to this conclusion.  
289 First, the PKA consensus motif RRxS was found as highly enriched in one of the clusters of sites  
290 being increasingly phosphorylated through the cell cycle. Second, many of the upstream regulators  
291 in the Ras branch of the PKA pathway change in phosphorylation state during the early cell cycle.  
292 Many of these phosphorylation sites are proline directed, raising the possibility that CDK itself  
293 activates PKA signalling. If true, CDK regulation of PKA would provide a mechanistic  
294 explanation of the spikes in cyclic-AMP concentrations at the G1/S and G2/M transitions observed  
295 previously (Muller et al., 2003). Since PKA has been reported to regulate CDK activity at the G1/S  
296 transition (Tokiwa et al., 1994; Amigoni et al., 2015; Ewald, 2018), it is likely that the interplay  
297 between CDK and PKA is at the nexus coordinating metabolism, growth and division with nutrient  
298 supply.

299 While the putative PKA and CDK sites we identified are increasingly phosphorylated through the  
300 cell cycle, for many of the sites we identified the opposite is true. We were surprised at the large  
301 amount of dephosphorylation we observed as cells pass the G1/S transition. Many of these targets  
302 were metabolic enzymes. This large-scale dephosphorylation may be in part due to changing  
303 activity of the phosphatase Glc7/PP1 together with its subunits associated with metabolism such  
304 as Reg1 and Gac1. Reg1 also targets and inactivates another important metabolic signalling  
305 pathway such as the Snf1 Kinase, a member of the highly conserved AMPK family. Snf1 has a  
306 well characterized activating site T210 that is phosphorylated by upstream sugar sensing kinases

307 and is dephosphorylated by Reg1. In both of our replicates, Snf1 T210 is dephosphorylated at the  
308 G1/S transition and re-phosphorylated as cells progress into mitosis consistent with the hypothesis  
309 that changing phosphatase activity may drive large-scale dephosphorylation through G1/S.

310 The dephosphorylation of Snf1 through G1/S may be important because when Snf1 is activated  
311 (like AMPK in mammals) it acts as a “brake pedal” slowing growth and energy consuming  
312 processes (Ghillebert et al., 2011; Coccetti et al., 2018). Thus, Snf1 inactivates many processes  
313 typically activated by PKA (Nicastro et al., 2015). During entry into the cell cycle at G1/S,  
314 phosphoregulation may shift the balance between PKA and Snf1 to enhance growth promoting  
315 pathways and rewire metabolism to turn storage compounds such as trehalose, glycogen or lipid  
316 droplets into macromolecules that support cell cycle progression (Figure 8B). This fine-tuned  
317 metabolic regulation likely does not matter much under the nutrient rich growth conditions (SCD,  
318 YPD) that most cell cycle studies are conducted in, but may be crucial in nutrient poor  
319 environments such as the ethanol minimal medium we used in this work.

320 Taken together, this and other work over the last decade (Kurat et al., 2009; Bryan et al., 2010;  
321 Goranov and Amon, 2010; Ewald et al., 2016; Zhao et al., 2016), shows that we need to revise the  
322 text book model that cell growth drives the cell cycle but not vice versa. Yeast physiology is likely  
323 determined by extensive cross talk between global regulators of metabolism, signalling pathways  
324 promoting growth, and the cell cycle control machinery (Ewald, 2018). More broadly, it seems  
325 safe to assume that all eukaryotes have extensive, multidirectional signalling mechanisms to  
326 coordinate metabolism, growth and the cell division cycle, given the many recent reports on the  
327 role of metabolism in proliferating tissues including cancer-, immune-, or stem cells (Vander  
328 Heiden and DeBerardinis, 2017; Corbet, 2018; Pearce and Pearce, 2018; Zhang et al., 2018; Dahan  
329 et al., 2019; Vaupel et al., 2019). We anticipate that over the coming decade this picture of  
330 interlinked metabolic and cell cycle control will be fleshed out as a broad array of post-translational  
331 modifications and allosteric interactions mediating cross-talk between metabolism and the cell  
332 division cycle are identified in model organisms and in humans.

333 **Author Contributions:** J.C.E., J.M.S., and J.E.E. conceived and designed the study; J.C.E., L.Z.,  
334 F.S. performed experiments; L.Z. and J.E.E. performed mass spectrometry and raw data analysis;  
335 S.W. and J.C.E. performed statistical analysis; O.K. advised on data analysis; J.C.E. and J.M.S.  
336 wrote the manuscript; all authors read and approved the manuscript.

337 **Acknowledgments:** We thank Katja Kleemann for excellent technical support. We kindly  
338 acknowledge Boris Macek and his lab for helpful discussions.

339 **Funding:** JCE gratefully acknowledges support by the Institutional Strategy of the University of  
340 Tübingen (Deutsche Forschungsgemeinschaft ZUK 63) We further acknowledge Deutsche  
341 Forschungsgemeinschaft and Open Access Publishing Fund of University of Tübingen for the  
342 support of publication costs. JMS was supported by the NIH through GM115479 and an HHMI-  
343 Simons Faculty Scholar Award.

344 **Conflict of Interest:** The authors declare no conflict of interest.

345 **Data Accessibility:** Processed data have been included as Supplementary Tables. The raw mass  
346 spectrometry proteomics data have been deposited to the ProteomeXchange Consortium via the PRIDE  
347 (Perez-Riverol et al., 2019) partner repository under the dataset identifier PXD015235.

348 **Materials and Methods**



## 349 **Cell cultivation and synchronization**

350 Cells were grown in 1 % ethanol minimal media (1.7 g yeast nitrogen base, 5 g/L ammonium phosphate,  
351 10 ml ethanol, pH adjusted to 5 with potassium hydroxide) at 30 °C and 250 rpm orbital shaking. For cell  
352 cycle arrest strain JE 611c (Ewald et al., 2016) was grown on 10 nM estradiol to an OD of approximately  
353 0.2. Cells were filtered, resuspended in estradiol-free medium, and grown for 15 hours. These G1 arrested  
354 cells were released by addition of 200 nM estradiol (dissolved at 1 mM in 100% ethanol). Cell cycle release  
355 was monitored by manual bud counting (>200 cells per sample) at 60x magnification.

## 356 **Sampling, protein extraction and digestion**

357 20 ml of cell culture (OD ~0.6) were sampled into 1.5 volumes of 60% methanol and precooled to -40°C  
358 to quench metabolic activity. Cells were spun at 4000 g. The pellets were frozen in liquid nitrogen and then  
359 stored at -80°C until further use. Cells were lysed by bead beating in 8M urea, 150 mM NaCl, 5 mM DTT,  
360 50 mM HEPES pH 8 supplemented with 1x Halt™ Protease and Phosphatase Inhibitor Cocktail  
361 (ThermoFisher Scientific). The lysate was centrifuged at 13,200 rpm for 15 min and the supernatant was  
362 transferred to fresh test tubes for a second round of centrifugation. Lysates from two parallel samples were  
363 combined to increase starting material. This was followed by an alkylation step using 14 mM iodoacetamide  
364 for 45 minutes at room temperature in the dark and the reaction was then quenched with DTT. In order to  
365 clean the proteins a methanol-chloroform precipitation was performed and the protein pellet was washed  
366 twice with acetone. The pellet was re-suspended with 8M urea in 50 mM HEPES (pH 8) and the total  
367 protein concentration was determined using the Pierce™ BCA Protein Assay Kit (Pierce, Rockford, IL).  
368 Approximately 4 mg of protein of each sample were diluted to 4 M urea using 50 mM HEPES (pH8) and  
369 digested with LysC (1:100) for 4 hours at room temperature. Samples were further diluted to 1 M urea using  
370 50 mM HEPES (pH8) and trypsin (Promega, Madison, WI) was added at a ratio of 1:20 enzyme: substrate  
371 for 16 hours at 37 °C. The digestion was quenched with formic acid and the peptides desalted using a Sep-  
372 Pak C18 1 cc Vac 50 mg Cartridge (Waters, Milford, MA). 5% of each sample was used for total proteome  
373 analysis and the remaining peptide was used for phosphopeptide enrichment.

374

## 375 **Phosphopeptide enrichment**

376 TiO<sub>2</sub> powder was resuspended in 2M lactic acid/50% acetonitrile (binding solution) at a concentration of  
377 25 mg/mL. Peptides were resuspended in 400 µl of binding solution and added to 640 µl of TiO<sub>2</sub> slurry and  
378 incubated for one hour while shaking. The samples were then spun down at 10,000 rpm for 1 min and the  
379 supernatant was removed. The TiO<sub>2</sub> pellet was washed with binding solution twice and then 0.1%  
380 trifluoroacetic acid/50% acetonitrile three times. Phosphopeptides were eluted off TiO<sub>2</sub> using 50 mM  
381 KH<sub>2</sub>PO<sub>4</sub> (pH 10 adjusted with ammonium hydroxide) twice, acidified with formic acid, and desalted using  
382 a Sep-Pak C18 column as above.

383

## 384 **TMT labelling and high-pH reversed-phase fractionation**

385 The TMT labelling reagents were obtained from Pierce and the labelling was performed according to the  
386 manufactures suggested procedure and previously published protocol (Zhang and Elias, 2017). In brief, in  
387 brief, 100 µg samples were resuspended in 100 µl of 50mM Na-HEPES and then 30 µl of acetonitrile was  
388 added to each sample. A TMT-10plex kit was used and each TMT reagent (0.8 mg per vial) was  
389 reconstituted in 40 µl of acetonitrile. 10 µl of the reagent was added to the corresponding sample to incubate  
390 for 1 h. To reverse unwanted TMT labelling with tyrosine residues, the reaction was quenched with a final  
391 concentration of 0.3 % (v/v) hydroxylamine for 15 min at room temperature. Samples were acidified with  
392 formic acid to pH 2. In order to assess the labelling efficiency a ratio-check was performed by combining  
393 5 µL of each sample, desalting by StageTip and then analysing with LC-MS. Based on the result from the

394 ratio-check equal amounts of each individual labelled sample were then combined to deliver an overall  
395 equal amounts across all channels. The combined peptides were desalted using a Sep-Pak C18 column and  
396 then fractionated by high-pH reverse phase fractionation (Yang et al., 2012) using an 84 min gradient  
397 (buffer A: 10 mM ammonium formate, pH 10; buffer B: 10 mM ammonium formate, 90 % ACN, 10 %  
398 H<sub>2</sub>O, pH 10) on an Agilent 1200 HPLC (Agilent Technologies, Santa Clara, USA). In total 84 fractions  
399 were collected, concatenated, combined into a total of 12 fractions, and then dried down. All fractions were  
400 desalted using Sep-Pak C18 column, dried down and resuspended in 0.1% formic acid for LC-MS analysis.

401

## 402 **Mass Spectrometry Analysis**

403 Peptides were separated on a 24 cm reversed phase column (100 µm inner diameter, packed in-house with  
404 ReproSil-Pur C18-AQ 3.0 m resin, Dr. Maisch GmbH) over 180 min using a two-step linear gradient with  
405 4–25 % buffer B (0.2% (v/v) formic acid in acetonitrile) for 120 min followed by 25-45 % buffer B for 15  
406 min at a 400 nL/min flowrate on an Dionex Ultimate 3000 LC-system (Thermo Scientific, San Jose, CA).  
407 Eluted peptides were analysed with a Fusion Lumos mass spectrometry system (Thermo Scientific, San  
408 Jose, CA). Full MS scans were performed in the Orbitrap in the mass range of 400-1500 m/z and the  
409 resolution was set to 120,000. The AGC setting was 4E5 and maximum injection time for FTMS1 was 50  
410 ms. Data dependent mode was set to top speed with duty cycle of 3s. Precursor ions with charge states 2-7  
411 were selected for fragmentation using collision induced dissociation (CID) with quadrupole isolation,  
412 isolation window of 0.7 m/z, normalized collision energy of 35% and activation Q of 0.25. MS2 fragments  
413 were analysed in the ion trap mass analyzer with turbo scan rate and maximum injection time of 50ms. Ions  
414 within a +/-10 ppm m/z window around ions selected for MS2 were excluded from further selection for  
415 fragmentation for 90 s. Following each MS2 CID, a MS3 higher-energy collisional dissociation (HCD) is  
416 performed with synchronous precursor selection enabled (the number of precursors set to 5) and collision  
417 energy of 65% (McAlister et al., 2014). HCD fragment ions were detected in the Orbitrap in the scan range  
418 of 120-500 m/z with resolution of 60,000, AGC setting of 10,000, and maximum ion time of 120 ms. The  
419 mass spectrometry proteomics data have been deposited to the ProteomeXchange Consortium via the  
420 PRIDE (Perez-Riverol et al., 2019) partner repository under the dataset identifier PXD015235.

421

## 422 **Data processing**

### 423 *Protein identification and quantification*

424 Raw data were searched using SEQUEST in Proteome Discoverer 2.2 against a sequence database of yeast  
425 (strain W303, NCBI taxonomy ID 559292, downloaded on July 28, 2016). Trypsin was selected as the  
426 enzyme with at most two missed cleavage sites. Precursor mass tolerance was set to +/- 10 ppm and  
427 fragment mass tolerance was set to +/- 0.6 Da. At most three dynamic modifications were allowed per  
428 peptide. Carbamidomethylation of cysteine (+57.021 Da) and TMT-labelled N-terminus and lysine  
429 (+229.163) were set as static modifications. Oxidation of methionine (+15.995 Da) and acetylation of  
430 protein N-terminus (+42.011 Da) were set as variable modifications. For phosphopeptides analysis  
431 phosphorylation of Serine, Tyrosine and Threonine (+79.967) were also set as differential modifications.  
432 Percolator was applied to filter incorrect identifications down to an estimated false discovery rate of 1% for  
433 both peptides and proteins. The PtmRS node was used for phosphosite assignment. For quantification, a  
434 mass tolerance of +/-20 ppm window was applied to the integration of report ions using the ‘most confident’  
435 centroid method and S/N values were reported as reporter abundances. For total proteome analysis, the  
436 threshold for average reporter S/N was set to 5, the threshold for co-isolation was set to 30%, and  
437 quantification results were rejected for missing channels. The data normalization mode was set to “total  
438 peptide amount” and scaling mode was set to “on channels average”.

### 439 *Phosphorylation site quantification*

440 For phosphosite analysis, PSMs were filtered to meet the following criteria: The phosphosite position  
441 confidence (ptmRS score) was set to > 75%; the threshold for average reporter S/N was set to 10; and the  
442 threshold for co-isolation was set to 30%. Only PSMs quantified in nine consecutive channels were included  
443 (so only the first or last time point were allowed to be zero). After filtering, the channels were normalized  
444 to the total intensity. PSMs were summed to unique peptides. Each phosphorylated site was then summed  
445 across all peptides containing that site. The quantification of each site was scaled by its mean before  
446 averaging the replicates.

447

### 448 **Statistical analysis**

#### 449 *Heuristic p-value and ranking*

450 To avoid any a priori assumptions of the shape of the time profiles, we ranked our time courses based on a  
451 heuristic p-value calculated in the following ways. For each phosphorylation site, we calculated a p-value  
452 from a t-test comparing the average of the first four to the last four time points. Also a regression over all  
453 timepoints as independent variables was performed to detect linear trends. Finally, we calculated the p-  
454 value of linear regressions in time windows of five time points moving across the time series to detect  
455 trends which do not span the whole time span. All values were corrected for multiple hypothesis testing  
456 with the Holm-Sidak correction. The minimum p-value obtained from these tests was then used to rank the  
457 phosphorylation sites.

458 To test whether this ranking separates changing from non-changing sites, we performed k-means clustering  
459 (see below) on sets of 1,000 sites from top to bottom rank, see Supplementary Figure 1. Based on the results  
460 from this clustering, we empirically decided to use the top third ranking phosphorylation sites for further  
461 analysis. For each site in each replicate, the correlation between the protein and phosphosite abundance  
462 was calculated. Phosphosites that correlated with Pearson's R greater than 0.8 in either replicate were  
463 removed from downstream phosphorylation analysis. Above procedures were carried out with statsmodels  
464 (0.9.0) in Python 3.6.8.

465

#### 466 *K-means Clustering*

467 k-means clustering was performed using the Matlab 2018b built-in algorithm with 1,000 iterations and 100  
468 replicates. The number of clusters was empirically set to five (see Supplementary Figure 2 for results for 4,  
469 6, and 8 clusters).

#### 470 *Principal Component Analysis*

471 A principal component analysis was performed on the normalized abundance data using Perseus 1.6.1.3  
472 (Tyanova et al., 2016).

#### 473 *Motif Enrichment*

474 Motif enrichment was performed using the MoMo function (Cheng et al., 2019) on the MEME suite  
475 (<http://meme-suite.org/>, accessed in May 2019) (Bailey et al., 2009) with the following settings: motif-x  
476 algorithm; background peptides extracted from reference sequence GeneBank *Saccharomyces cerevisiae*  
477 uid 128; motif width 13; central residues with same modification mass combined; p-value threshold was  
478 set to 0.0001.

479

## 480 *Subgraph Analysis*

481 Deregulated subgraph were calculated with DeRegNet (<https://github.com/sebwink/deregnet>) (Winkler et  
482 al in prep, (Backes et al., 2012). DeRegNet takes a regulatory network (e.g. constructed from KEGG) and  
483 assigns a “deregulation” score to each node (protein) in the network. For every protein the minimum p-  
484 value across all associated sites was taken as a basis to calculate deregulation scores. As deregulation score  
485 we used binary scores defined as 1 for p-values < 0.1 and as 0 otherwise. DeRegNet then calculated a  
486 connected subnetwork within the Yeast KEGG network with maximal average deregulation score (sum of  
487 deregulation score of nodes in subgraph divided by number of nodes in the subgraph).

488

## 489 **References**

- 490 Amigoni, L., Colombo, S., Belotti, F., Alberghina, L., and Martegani, E. (2015). The transcription factor  
491 Swi4 is target for PKA regulation of cell size at the G1 to S transition in *Saccharomyces*  
492 *cerevisiae*. *Cell Cycle* 14(15), 2429-2438. doi: 10.1080/15384101.2015.1055997.
- 493 Archambault, V., Chang, E.J., Drapkin, B.J., Cross, F.R., Chait, B.T., and Rout, M.P. (2004). Targeted  
494 proteomic study of the cyclin-Cdk module. *Mol Cell* 14(6), 699-711. doi:  
495 10.1016/j.molcel.2004.05.025.
- 496 Backes, C., Rurainski, A., Klau, G.W., Muller, O., Stockel, D., Gerasch, A., et al. (2012). An integer linear  
497 programming approach for finding deregulated subgraphs in regulatory networks. *Nucleic Acids*  
498 *Research* 40(6). doi: ARTN e4310.1093/nar/gkr1227.
- 499 Bailey, T.L., Boden, M., Buske, F.A., Frith, M., Grant, C.E., Clementi, L., et al. (2009). MEME SUITE: tools  
500 for motif discovery and searching. *Nucleic Acids Res* 37(Web Server issue), W202-208. doi:  
501 10.1093/nar/gkp335.
- 502 Brauer, M.J., Huttenhower, C., Airoidi, E.M., Rosenstein, R., Matese, J.C., Gresham, D., et al. (2008).  
503 Coordination of growth rate, cell cycle, stress response, and metabolic activity in yeast. *Mol Biol*  
504 *Cell* 19(1), 352-367. doi: 10.1091/mbc.e07-08-0779.
- 505 Broach, J.R. (2012). Nutritional control of growth and development in yeast. *Genetics* 192(1), 73-105.  
506 doi: 10.1534/genetics.111.135731.
- 507 Bryan, A.K., Goranov, A., Amon, A., and Manalis, S.R. (2010). Measurement of mass, density, and volume  
508 during the cell cycle of yeast. *Proceedings of the National Academy of Sciences of the United*  
509 *States of America* 107(3), 999-1004. doi: 10.1073/pnas.0901851107.
- 510 Cannon, J.F. (2010). Function of Protein Phosphatase-1, Glc7, in *Saccharomyces cerevisiae*. *Advances in*  
511 *Applied Microbiology, Vol 73* 73, 27-59. doi: 10.1016/S0065-2164(10)73002-1.
- 512 Carpy, A., Krug, K., Graf, S., Koch, A., Popic, S., Hauf, S., et al. (2014). Absolute Proteome and  
513 Phosphoproteome Dynamics during the Cell Cycle of *Schizosaccharomyces pombe* (Fission  
514 Yeast). *Molecular & Cellular Proteomics* 13(8), 1925-1936. doi: 10.1074/mcp.M113.035824.
- 515 Chen, Y., and Nielsen, J. (2016). Flux control through protein phosphorylation in yeast. *Fems Yeast*  
516 *Research* 16(8). doi: ARTN fow09610.1093/femsyr/fow096.
- 517 Cheng, A., Grant, C.E., Noble, W.S., and Bailey, T.L. (2019). MoMo: discovery of statistically significant  
518 post-translational modification motifs. *Bioinformatics* 35(16), 2774-2782. doi:  
519 10.1093/bioinformatics/bty1058.
- 520 Coccetti, P., Nicastro, R., and Tripodi, F. (2018). Conventional and emerging roles of the energy sensor  
521 Snf1/AMPK in *Saccharomyces cerevisiae*. *Microbial Cell* 5(11), 482-494. doi:  
522 10.15698/mic2018.11.655.
- 523 Conrad, M., Schothorst, J., Kankipati, H.N., Van Zeebroeck, G., Rubio-Texeira, M., and Thevelein, J.M.  
524 (2014). Nutrient sensing and signaling in the yeast *Saccharomyces cerevisiae*. *Fems Microbiology*  
525 *Reviews* 38(2), 254-299. doi: 10.1111/1574-6976.12065.

- 526 Corbet, C. (2018). Stem Cell Metabolism in Cancer and Healthy Tissues: Pyruvate in the Limelight.  
527 *Frontiers in Pharmacology* 8. doi: ARTN 95810.3389/fphar.2017.00958.
- 528 Dahan, P., Lu, V., Nguyen, R.M.T., Kennedy, S.A.L., and Teitell, M.A. (2019). Metabolism in pluripotency:  
529 Both driver and passenger? *J Biol Chem* 294(14), 5420-5429. doi: 10.1074/jbc.TM117.000832.
- 530 Enserink, J.M., and Kolodner, R.D. (2010). An overview of Cdk1-controlled targets and processes. *Cell Div*  
531 5, 11. doi: 10.1186/1747-1028-5-11.
- 532 Ewald, J.C. (2018). How yeast coordinates metabolism, growth and division. *Curr Opin Microbiol* 45, 1-7.  
533 doi: 10.1016/j.mib.2017.12.012.
- 534 Ewald, J.C., Kuehne, A., Zamboni, N., and Skotheim, J.M. (2016). The Yeast Cyclin-Dependent Kinase  
535 Routes Carbon Fluxes to Fuel Cell Cycle Progression. *Mol Cell* 62(4), 532-545. doi:  
536 10.1016/j.molcel.2016.02.017.
- 537 Galbraith, M.D., Andrysiak, Z., Pandey, A., Hoh, M., Bonner, E.A., Hill, A.A., et al. (2017). CDK8 Kinase  
538 Activity Promotes Glycolysis. *Cell Reports* 21(6), 1495-1506. doi: 10.1016/j.celrep.2017.10.058.
- 539 Gasch, A.P., and Werner-Washburne, M. (2002). The genomics of yeast responses to environmental  
540 stress and starvation. *Funct Integr Genomics* 2(4-5), 181-192. doi: 10.1007/s10142-002-0058-2.
- 541 Ghillebert, R., Swinnen, E., Wen, J., Vandesteene, L., Ramon, M., Norga, K., et al. (2011). The  
542 AMPK/SNF1/SnRK1 fuel gauge and energy regulator: structure, function and regulation. *Febs*  
543 *Journal* 278(21), 3978-3990. doi: 10.1111/j.1742-4658.2011.08315.x.
- 544 Godfrey, M., Touati, S.A., Kataria, M., Jones, A., Snijders, A.P., and Uhlmann, F. (2017). PP2A(Cdc55)  
545 Phosphatase Imposes Ordered Cell-Cycle Phosphorylation by Opposing Threonine  
546 Phosphorylation. *Mol Cell* 65(3), 393-402 e393. doi: 10.1016/j.molcel.2016.12.018.
- 547 Goranov, A.I., and Amon, A. (2010). Growth and division--not a one-way road. *Curr Opin Cell Biol* 22(6),  
548 795-800. doi: 10.1016/j.ceb.2010.06.004.
- 549 Hardie, D.G. (2011). AMP-activated protein kinase--an energy sensor that regulates all aspects of cell  
550 function. *Genes & Development* 25(18), 1895-1908. doi: 10.1101/gad.17420111.
- 551 Hartwell, L.H., Culotti, J., Pringle, J.R., and Reid, B.J. (1974). Genetic control of the cell division cycle in  
552 yeast. *Science* 183(4120), 46-51.
- 553 Holt, L.J., Tuch, B.B., Villen, J., Johnson, A.D., Gygi, S.P., and Morgan, D.O. (2009). Global analysis of Cdk1  
554 substrate phosphorylation sites provides insights into evolution. *Science* 325(5948), 1682-1686.  
555 doi: 10.1126/science.1172867.
- 556 Icreverzi, A., de la Cruz, A.F., Van Voorhies, W.A., and Edgar, B.A. (2012). Drosophila cyclin D/Cdk4  
557 regulates mitochondrial biogenesis and aging and sensitizes animals to hypoxic stress. *Cell Cycle*  
558 11(3), 554-568. doi: 10.4161/cc.11.3.19062.
- 559 Johnston, G.C., Pringle, J.R., and Hartwell, L.H. (1977). Coordination of Growth with Cell-Division in Yeast  
560 *Saccharomyces-Cerevisiae*. *Experimental Cell Research* 105(1), 79-98. doi: Doi 10.1016/0014-  
561 4827(77)90154-9.
- 562 Kataria, M., Mouilleron, S., Seo, M.H., Corbi-Verge, C., Kim, P.M., and Uhlmann, F. (2018). A PxL motif  
563 promotes timely cell cycle substrate dephosphorylation by the Cdc14 phosphatase. *Nat Struct*  
564 *Mol Biol* 25(12), 1093-1102. doi: 10.1038/s41594-018-0152-3.
- 565 Kurat, C.F., Wolinski, H., Petschnigg, J., Kaluarachchi, S., Andrews, B., Nafter, K., et al. (2009).  
566 Cdk1/Cdc28-Dependent Activation of the Major Triacylglycerol Lipase Tgl4 in Yeast Links  
567 Lipolysis to Cell-Cycle Progression. *Molecular Cell* 33(1), 53-63. doi:  
568 10.1016/j.molcel.2008.12.019.
- 569 Lowdon, M., and Vitols, E. (1973). Ribonucleotide reductase activity during the cell cycle of  
570 *Saccharomyces cerevisiae*. *Arch Biochem Biophys* 158(1), 177-184. doi: 10.1016/0003-  
571 9861(73)90611-5.

- 572 Ma, X.Y., Wang, L., Huang, D., Li, Y.Y., Yang, D.D., Li, T.T., et al. (2017). Polo-like kinase 1 coordinates  
573 biosynthesis during cell cycle progression by directly activating pentose phosphate pathway.  
574 *Nature Communications* 8. doi: ARTN 150610.1038/s41467-017-01647-5.
- 575 McAlister, G.C., Nusinow, D.P., Jedrychowski, M.P., Wuhr, M., Huttlin, E.L., Erickson, B.K., et al. (2014).  
576 MultiNotch MS3 Enables Accurate, Sensitive, and Multiplexed Detection of Differential  
577 Expression across Cancer Cell Line Proteomes. *Analytical Chemistry* 86(14), 7150-7158. doi:  
578 10.1021/ac502040v.
- 579 Mochida, S., and Hunt, T. (2012). Protein phosphatases and their regulation in the control of mitosis.  
580 *Embo Reports* 13(3), 197-203. doi: 10.1038/embor.2011.263.
- 581 Mok, J., Kim, P.M., Lam, H.Y., Piccirillo, S., Zhou, X., Jeschke, G.R., et al. (2010). Deciphering protein  
582 kinase specificity through large-scale analysis of yeast phosphorylation site motifs. *Sci Signal*  
583 3(109), ra12. doi: 10.1126/scisignal.2000482.
- 584 Morgan, D.O. (ed.). (2007). *The Cell Cycle: Principles of Control*. London: New Science Press.
- 585 Morgan, D.O. (2008). SnapShot: cell-cycle regulators I. *Cell* 135(4), 764-764 e761. doi: S0092-  
586 8674(08)01376-7 [pii] 10.1016/j.cell.2008.10.039.
- 587 Muller, D., Exler, S., Aguilera-Vazquez, L., Guerrero-Martin, E., and Reuss, M. (2003). Cyclic AMP  
588 mediates the cell cycle dynamics of energy metabolism in *Saccharomyces cerevisiae*. *Yeast*  
589 20(4), 351-367. doi: 10.1002/yea.967.
- 590 Nicastro, R., Tripodi, F., Gaggini, M., Castoldi, A., Reghellin, V., Nonnis, S., et al. (2015). Snf1  
591 Phosphorylates Adenylate Cyclase and Negatively Regulates Protein Kinase A-dependent  
592 Transcription in *Saccharomyces cerevisiae*. *Journal of Biological Chemistry* 290(41), 24715-  
593 24726. doi: 10.1074/jbc.M115.658005.
- 594 Oliveira, A.P., Ludwig, C., Picotti, P., Kogadeeva, M., Aebersold, R., and Sauer, U. (2012). Regulation of  
595 yeast central metabolism by enzyme phosphorylation. *Molecular Systems Biology* 8. doi: ARTN  
596 62310.1038/msb.2012.55.
- 597 Ottoz, D.S., Rudolf, F., and Stelling, J. (2014). Inducible, tightly regulated and growth condition-  
598 independent transcription factor in *Saccharomyces cerevisiae*. *Nucleic Acids Res* 42(17), e130.  
599 doi: 10.1093/nar/gku616.
- 600 Pearce, E.J., and Pearce, E.L. (2018). Driving immunity: all roads lead to metabolism. *Nature Reviews*  
601 *Immunology* 18(2), 81+. doi: 10.1038/nri.2017.139.
- 602 Perez-Riverol, Y., Csordas, A., Bai, J.W., Bernal-Llinares, M., Hewapathirana, S., Kundu, D.J., et al. (2019).  
603 The PRIDE database and related tools and resources in 2019: improving support for  
604 quantification data. *Nucleic Acids Research* 47(D1), D442-D450. doi: 10.1093/nar/gky1106.
- 605 Pringle, J.R., and Hartwell, L.H. (1981). *The Saccharomyces cerevisiae Cell Cycle*.
- 606 Ptacek, J., Devgan, G., Michaud, G., Zhu, H., Zhu, X., Fasolo, J., et al. (2005). Global analysis of protein  
607 phosphorylation in yeast. *Nature* 438(7068), 679-684. doi: 10.1038/nature04187.
- 608 Ramirez-Gaona, M., Marcu, A., Pon, A., Guo, A.C., Sajed, T., Wishart, N.A., et al. (2017). YMDB 2.0: a  
609 significantly expanded version of the yeast metabolome database. *Nucleic Acids Research*  
610 45(D1), D440-D445. doi: 10.1093/nar/gkw1058.
- 611 Rogers, S., McCloy, R., Watkins, D.N., and Burgess, A. (2016). Mechanisms regulating phosphatase  
612 specificity and the removal of individual phosphorylation sites during mitotic exit. *Bioessays* 38,  
613 S24-S32. doi: 10.1002/bies.201670905.
- 614 Rosebrock, A.P. (2017). Methods for Synchronization and Analysis of the Budding Yeast Cell Cycle. *Cold*  
615 *Spring Harb Protoc* 2017(1), pdb top080630. doi: 10.1101/pdb.top080630.
- 616 Schwartz, D., and Gygi, S.P. (2005). An iterative statistical approach to the identification of protein  
617 phosphorylation motifs from large-scale data sets. *Nat Biotechnol* 23(11), 1391-1398. doi:  
618 10.1038/nbt1146.

- 619 Smith, F.C., Davies, S.P., Wilson, W.A., Carling, D., and Hardie, D.G. (1999). The SNF1 kinase complex  
620 from *Saccharomyces cerevisiae* phosphorylates the transcriptional repressor protein Mig1p in  
621 vitro at four sites within or near regulatory domain 1. *Febs Letters* 453(1-2), 219-223. doi: Doi  
622 10.1016/S0014-5793(99)00725-5.
- 623 Solaki, M., and Ewald, J.C. (2018). Fueling the Cycle: CDKs in Carbon and Energy Metabolism. *Frontiers in*  
624 *Cell and Developmental Biology* 6. doi: UNSP 9310.3389/fcell.2018.00093.
- 625 Swaffer, M.P., Jones, A.W., Flynn, H.R., Snijders, A.P., and Nurse, P. (2016). CDK Substrate  
626 Phosphorylation and Ordering the Cell Cycle. *Cell* 167(7), 1750-1761 e1716. doi:  
627 10.1016/j.cell.2016.11.034.
- 628 Tokiwa, G., Tyers, M., Volpe, T., and Futcher, B. (1994). Inhibition of G1 cyclin activity by the Ras/cAMP  
629 pathway in yeast. *Nature* 371(6495), 342-345. doi: 10.1038/371342a0.
- 630 Touati, S.A., Kataria, M., Jones, A.W., Snijders, A.P., and Uhlmann, F. (2018). Phosphoproteome  
631 dynamics during mitotic exit in budding yeast. *EMBO J* 37(10). doi: 10.15252/embj.201798745.
- 632 Touati, S.A., and Uhlmann, F. (2018). A global view of substrate phosphorylation and dephosphorylation  
633 during budding yeast mitotic exit. *Microb Cell* 5(8), 389-392. doi: 10.15698/mic2018.08.644.
- 634 Tu, J.L., and Carlson, M. (1995). Reg1 Binds to Protein Phosphatase Type-1 and Regulates Glucose  
635 Repression in *Saccharomyces-Cerevisiae*. *Embo Journal* 14(23), 5939-5946. doi: DOI  
636 10.1002/j.1460-2075.1995.tb00282.x.
- 637 Tudzarova, S., Colombo, S.L., Stoeber, K., Carcamo, S., Williams, G.H., and Moncada, S. (2011). Two  
638 ubiquitin ligases, APC/C-Cdh1 and SKP1-CUL1-F (SCF)-beta-TrCP, sequentially regulate glycolysis  
639 during the cell cycle. *Proceedings of the National Academy of Sciences of the United States of*  
640 *America* 108(13), 5278-5283. doi: 10.1073/pnas.1102247108.
- 641 Tyanova, S., Temu, T., Sinitcyn, P., Carlson, A., Hein, M.Y., Geiger, T., et al. (2016). The Perseus  
642 computational platform for comprehensive analysis of (prote)omics data. *Nature Methods* 13(9),  
643 731-740. doi: 10.1038/Nmeth.3901.
- 644 Ubersax, J.A., Woodbury, E.L., Quang, P.N., Paraz, M., Blethrow, J.D., Shah, K., et al. (2003). Targets of  
645 the cyclin-dependent kinase Cdk1. *Nature* 425(6960), 859-864. doi: 10.1038/nature02062.
- 646 Vander Heiden, M.G., and DeBerardinis, R.J. (2017). Understanding the Intersections between  
647 Metabolism and Cancer Biology. *Cell* 168(4). doi: 10.1016/j.cell.2016.12.039.
- 648 Vaupel, P., Schmidberger, H., and Mayer, A. (2019). The Warburg effect: essential part of metabolic  
649 reprogramming and central contributor to cancer progression. *International Journal of Radiation*  
650 *Biology* 95(7), 912-919. doi: 10.1080/09553002.2019.1589653.
- 651 Verbinnen, I., Ferreira, M., and Bollen, M. (2017). Biogenesis and activity regulation of protein  
652 phosphatase 1 (vol 45, pg 89, 2017). *Biochemical Society Transactions* 45, 583-584. doi:  
653 10.1042/Bst-2016-0154c\_Cor.
- 654 Wang, H.Z., Nicolay, B.N., Chick, J.M., Gao, X.L., Geng, Y., Ren, H., et al. (2017). The metabolic function of  
655 cyclin D3-CDK6 kinase in cancer cell survival. *Nature* 546(7658), 426+. doi:  
656 10.1038/nature22797.
- 657 Yang, F., Shen, Y., Camp, D.G., 2nd, and Smith, R.D. (2012). High-pH reversed-phase chromatography  
658 with fraction concatenation for 2D proteomic analysis. *Expert Rev Proteomics* 9(2), 129-134. doi:  
659 10.1586/epr.12.15.
- 660 Zhang, J., Zhao, J., Dahan, P., Lu, V., Zhang, C., Li, H., et al. (2018). Metabolism in Pluripotent Stem Cells  
661 and Early Mammalian Development. *Cell Metabolism* 27(2), 332-338. doi:  
662 10.1016/j.cmet.2018.01.008.
- 663 Zhang, L.C., and Elias, J.E. (2017). Relative Protein Quantification Using Tandem Mass Tag Mass  
664 Spectrometry. *Proteomics: Methods and Protocols* 1550, 185-198. doi: 10.1007/978-1-4939-  
665 6747-6\_14.

666 Zhao, G., Chen, Y., Carey, L., and Futcher, B. (2016). Cyclin-Dependent Kinase Co-Ordinates Carbohydrate  
667 Metabolism and Cell Cycle in *S. cerevisiae*. *Mol Cell* 62(4), 546-557. doi:  
668 10.1016/j.molcel.2016.04.026.

669

670



671

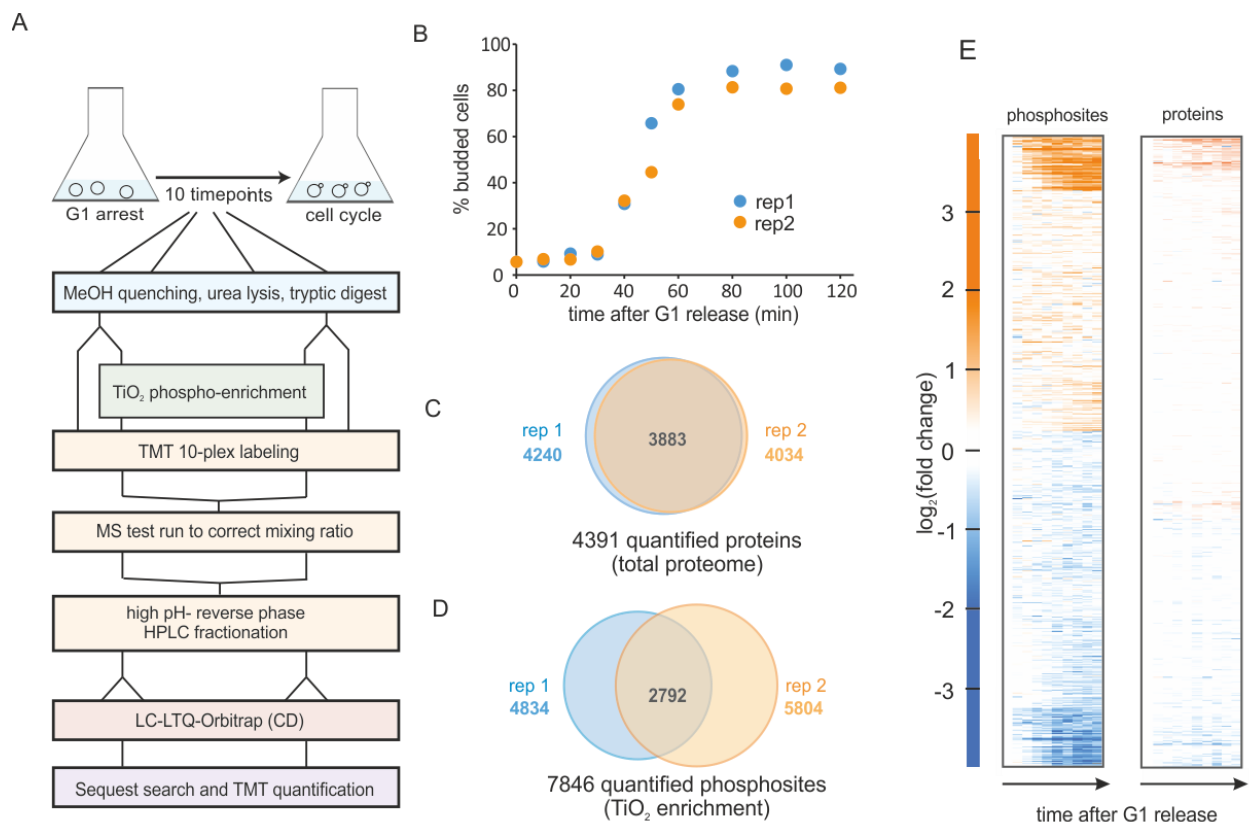

672

673

674 **Figure 1:** Phospho-proteomics time course of yeast cells released synchronously from G1 on ethanol  
675 minimal medium. **A.** Experimental workflow for sampling, phospho-enrichment, TMT labelling and mass  
676 spectrometry analysis **B.** Budding index of two replicate cultures released from a G1 arrest. **C.** Total protein  
677 and **D.** phosphorylated sites quantified in the two replicate experiments. **E.** Heatmap of the averaged  
678 replicates ( $\log_2$  fold changes relative to  $t=0$  min) for phosphorylated sites and quantified proteins.

679

680

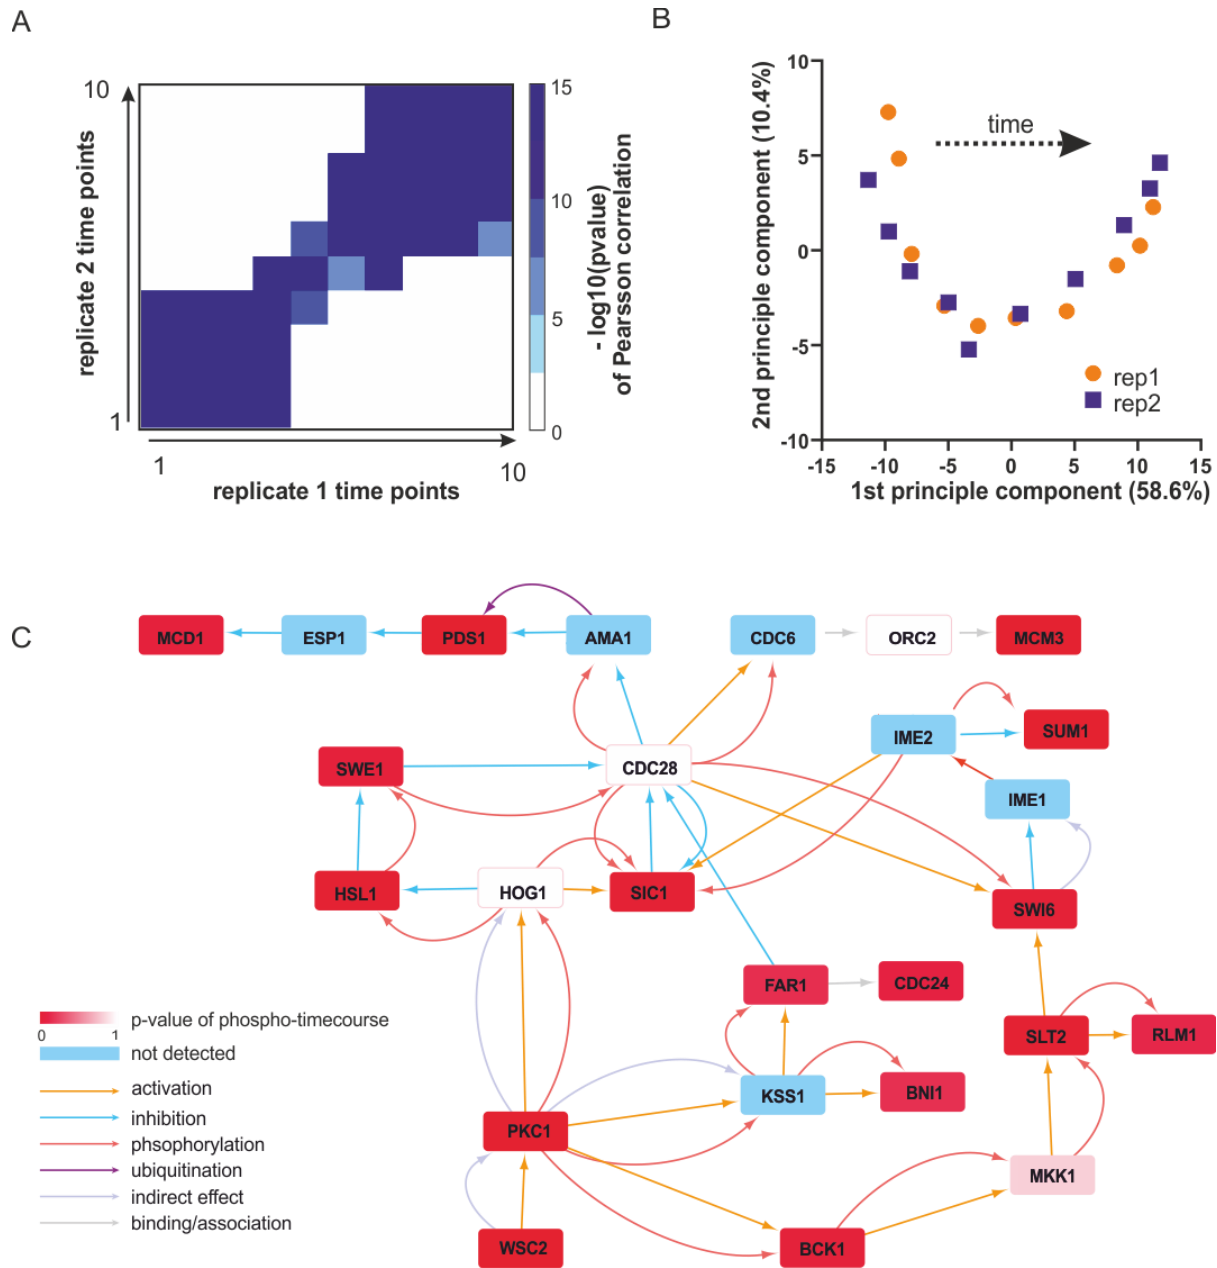

681

682

683 **Figure 2:** Data overview and quality controls. A. All time points of replicate 1 were correlated with all time  
 684 points from replicate 2 (based on top 3<sup>rd</sup> ranking phosphosites, see methods). Shown is a heatmap of the  $-\log_{10}(\text{p-value})$  of a Pearson correlation for all time points of one replicate with those of the other replicate.  
 685

686 B. Principle component analysis performed with the top 3<sup>rd</sup> of the identified phosphosites. Plotted are the  
 687 ten time points of each replicate projected onto the first two principle components. C. Regulated sub-  
 688 network identified from the top-ranking phosphoproteome data by the DeRegNet software (see methods)  
 689 based on the KEGG interaction network. The type of interaction annotated in KEGG is indicated by the  
 690 colour of the arrow.  
 691

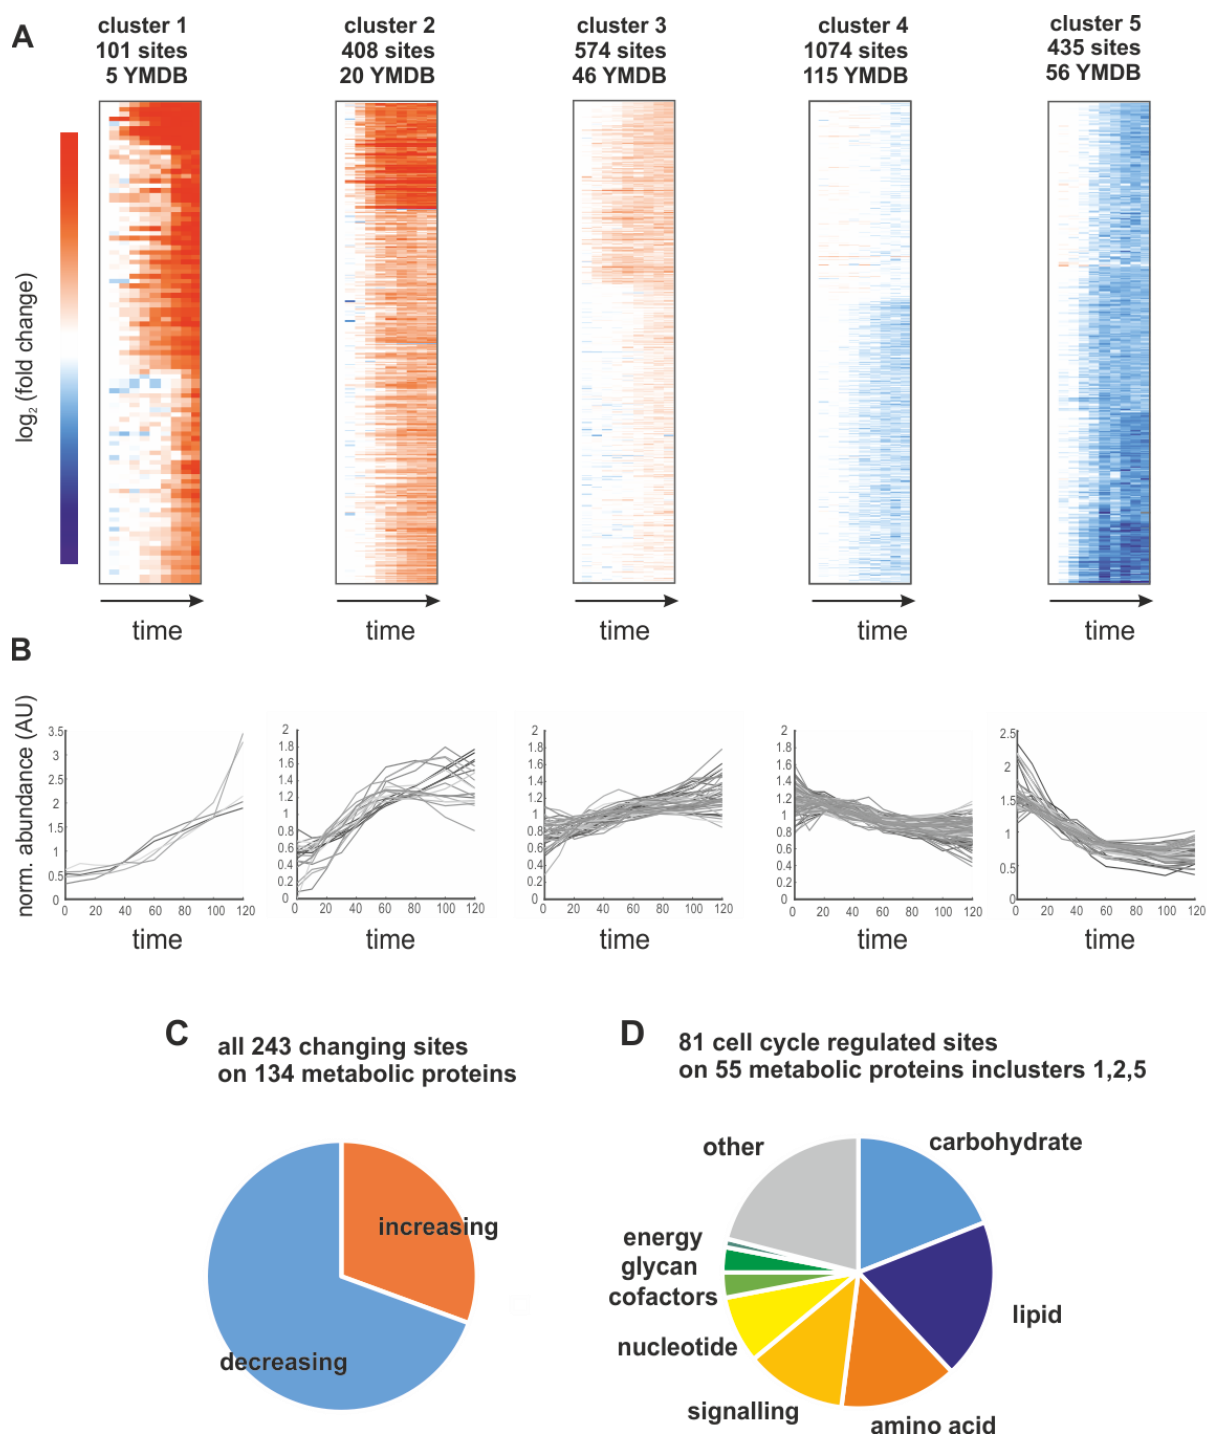

692

693

694 **Figure 3.** A. Heatmaps of the five identified clusters based on  $\log_2$  (fold change) relative to  $t=0$  minutes.  
 695 We report the number of sites contributing to the cluster and how many of those map to proteins in the yeast  
 696 metabolome database (YMDB). B. Time course of phosphosite abundance for all sites on a YMDB protein  
 697 in the corresponding cluster. C. Pie chart reporting the fraction of phosphosites on YMDB metabolic  
 698 proteins whose abundance is increasing or decreasing through the cell cycle. D. Pie chart reporting the

699 pathway assignments of most changing the phosphorylation sites whose abundance changes the most  
700 through the cell cycle.

701

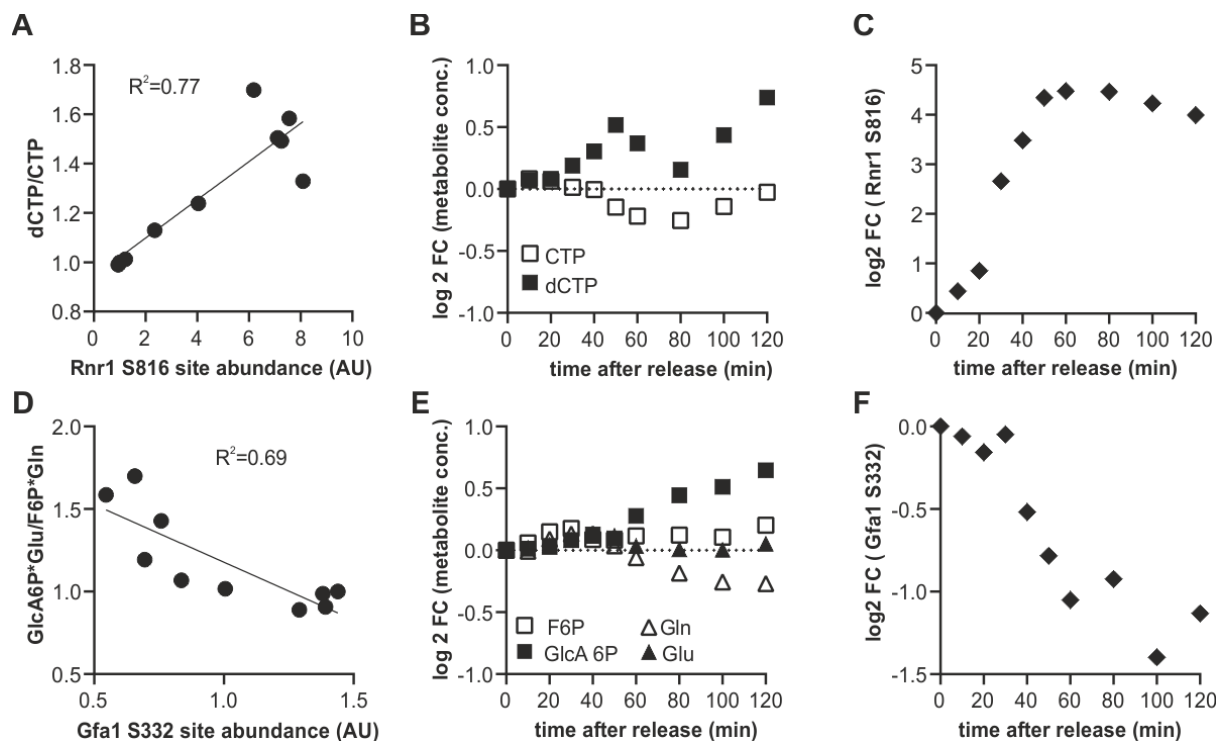

702

703

704 **Figure 4:** Identification of putative potential flux controlling phosphorylation sites based on the product to  
705 substrate ratio from published metabolomics data (6) A.-C. Example of a putative activating  
706 phosphorylation site showing the correlation of the serine 816 on ribonucleoreductase 1 (Rnr1) with the  
707 dCTP to CTP ratio, and the corresponding cell cycle time courses. D-F. Example of a putative inhibiting  
708 phosphorylation site showing anti-correlation of serine 332 of Glutamine-fructose-6-phosphate  
709 amidotransferase (Gfa1) with the ratio of its products and substrates.

710

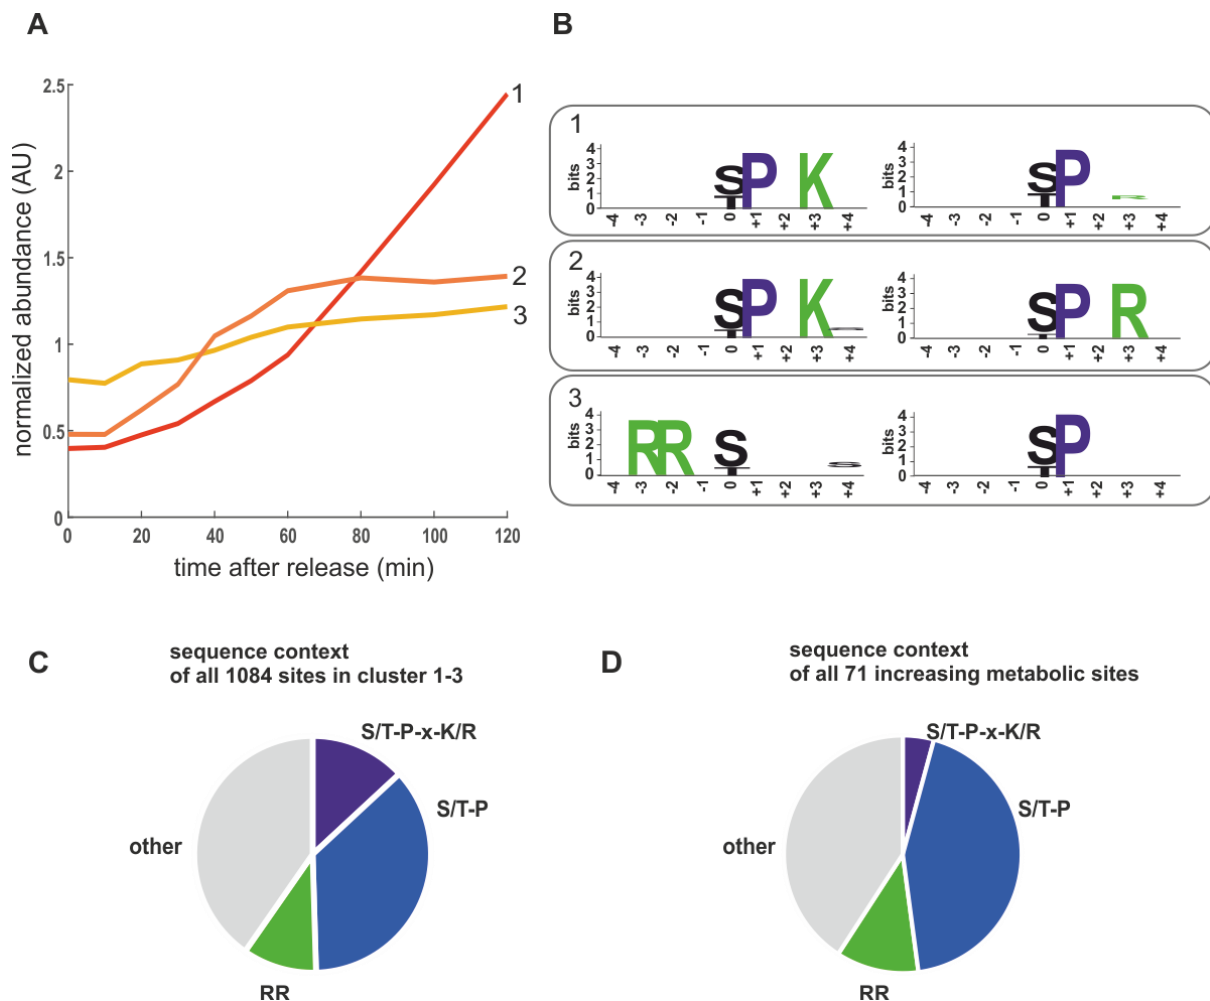

711

712 **Figure 5:** Motifs enriched in increasing phosphorylation sites. A. Cluster averages of three increasing  
 713 clusters identified by kmeans clustering. B. Enriched motifs identified in the increasing clusters using the  
 714 motif-X algorithm. The two most enriched motifs for each cluster are shown (>10-fold enriched,  $p < 10^{-6}$ ).  
 715 C. Pie chart depicting the sequence context of all sites in the cell cycle increasing clusters 1-3. D. Pie  
 716 chart depicting the sequence context of the cell cycle increasing phosphosites on metabolic proteins. RR  
 717 denotes motifs potentially recognized by PKA including RRxS, RRxxS, and RxRxS. S/T-P-x-K/R is the  
 718 optimal CDK consensus site.

719

720

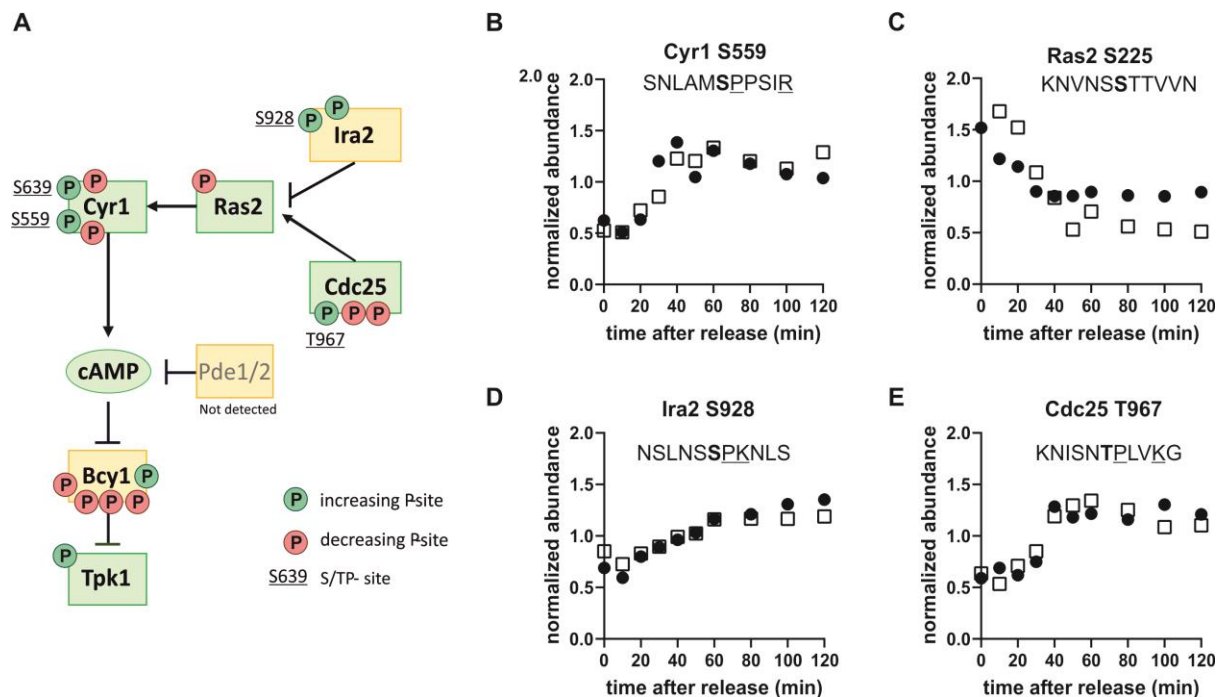

721

722

723 **Figure 6:** The protein kinase A pathway is phospho-regulated through the cell cycle. A. Map of the Ras-  
 724 ras-branch of the PKA pathway. Circles indicate sites whose phosphorylation increases (green, clusters 1-3) or  
 725 decreases (red, clusters 4-5) through the cell cycle. Only sites found in both replicates are reported. S/TP  
 726 sites, possibly phosphorylated by cyclin-dependent kinases, are denoted by their residue numbers adjacent  
 727 to the phosphorylation site. B-E. Examples of dynamic phosphorylation of sites on different upstream  
 728 regulators of PKA through the cell cycle. Residues associated with consensus cyclin-dependent kinase sites  
 729 are underlined and the phosphorylated residue is shown in bold.

730

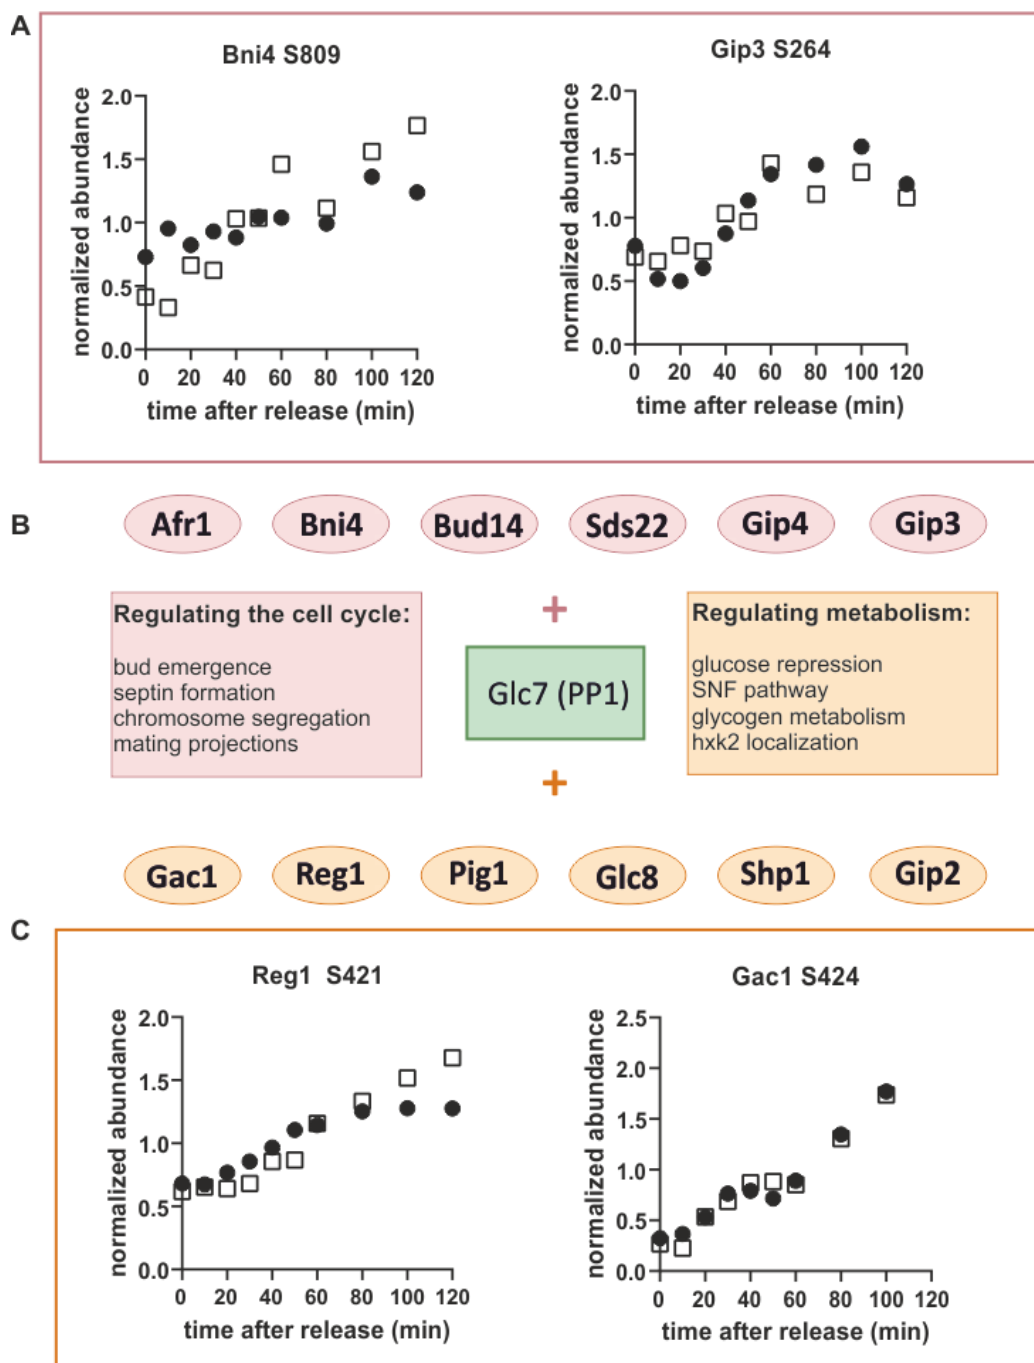

731

732 **Figure 7:** Glc7 (PP1) may regulate metabolism through the cell cycle. A. Cell cycle-dependent  
 733 phosphorylation of the Glc7 subunits, Bni4 and Gip3, which are known to contribute to cell cycle  
 734 regulation. B. Schematic showing regulatory subunits of the phosphatase Glc7 and their annotated  
 735 functions. C. Cell cycle time courses of phosphorylation of the Glc7 subunits Reg1 and Gac1, which are  
 736 known to contribute to metabolic regulation. Time courses from both replicates are shown.

737

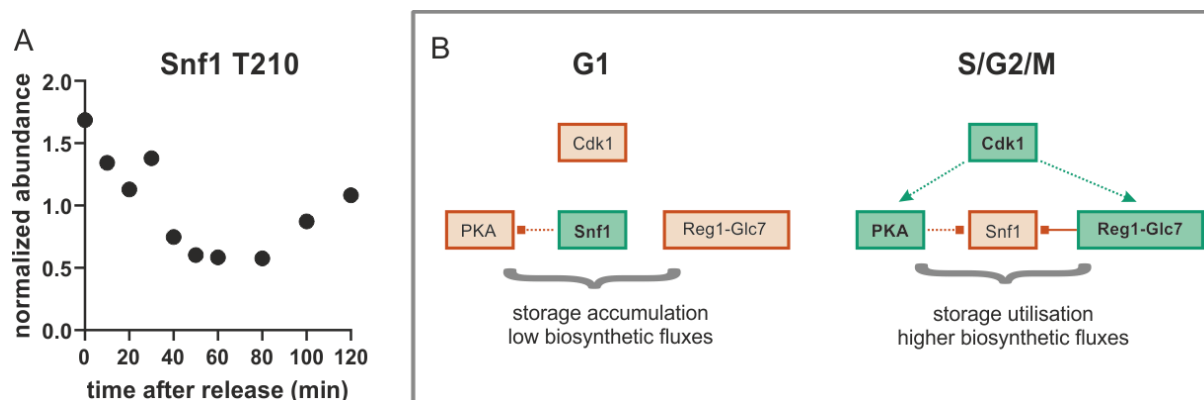

738

739 **Figure 8:** A. The well conserved activating site T210 on Snf1 is dephosphorylated during the G1-S-  
740 transition (average of both replicates) B. Model for global metabolic regulation during cell cycle  
741 progression on ethanol minimal medium. Red: low activity; green: higher activity; dotted lines: indirect or  
742 putative regulatory interactions; solid line: direct regulatory interaction

743

744

745
